# Supplementary material
Source: MDPI journal article supplement (https://www.mdpi.com/2304-6767/8/3/103)
Supplement: s1 [file s1]

The aim of this survey is to investigate dental students and graduates knowledge of evidence-based dentistry, and to find out what information sources they use in their dental work.

### **Background characteristics**

1. Year of study:    Year 3 ☐                      Year 4 ☐                      Year 5 ☐
2. Gender: ☐ Male                      ☐ Female

### ***Evidence-based dentistry***

3. Assessing level of evidence.

Please rate the following alternatives for the level of evidence they exhibit on a scale of 1 – 4, with most reliable information as 1 and least reliable as 4.

- ☐ Cohort or longitudinal studies
- ☐ Randomized controlled trials or observational studies with a significant effect
- ☐ Case-control studies
- ☐ Systematic reviews and meta-analyses of randomized controlled trials
- ☐ I don't know

4. What is meta-analysis?

- ☐ A statistical method in which results from several studies have been combined and analyzed using quantitative methods
- ☐ Tool to evaluate the quality of systematic reviews
- ☐ Summary of studies with clear clinical significance
- ☐ I don't know

5. What is PICO?

- ☐ Abbreviation to describe the elements of good clinical questions
- ☐ Abbreviation of a collaboration group, which has defined criteria for treatment guidelines
- ☐ Abbreviation for evidence-based treatment phases in dental clinic
- ☐ I don't know

### ***Information retrieval as an undergraduate dental student***

6. Rate your personal skills in searching for scientific information

- ☐ Excellent
- ☐ Good
- ☐ Satisfactory
- ☐ Mediocre
- ☐ Poor

7. How often have you used the following information sources as an undergraduate student in the last six months?

|                                                                                    | Daily | Weekly | Less than weekly | Never |
|------------------------------------------------------------------------------------|-------|--------|------------------|-------|
| Dental textbooks                                                                   |       |        |                  |       |
| Other textbooks                                                                    |       |        |                  |       |
| Colleagues                                                                         |       |        |                  |       |
| Current clinical practice guidelines by Oral health division Of Ministry of Health |       |        |                  |       |
| Other guideline, Please name                                                       |       |        |                  |       |
| National Dental Journals/ Journals of local Universities                           |       |        |                  |       |
| Evidence Based Dentistry journals                                                  |       |        |                  |       |
| Other dental journals                                                              |       |        |                  |       |
| Cochrane library                                                                   |       |        |                  |       |
| Medline / PubMed article database                                                  |       |        |                  |       |
| Personal lecture notes                                                             |       |        |                  |       |
| Advertisements                                                                     |       |        |                  |       |
| Other sources, Please name                                                         |       |        |                  |       |

8. Do you easily find the needed scientific information from the **Internet**?

☐ Yes      ☐ No      ☐ I don't know

9. Have you used any one of the following online databases?

|                                                 | Daily | Weekly | Less than | Never |
|-------------------------------------------------|-------|--------|-----------|-------|
| Pharmacological database                        |       |        |           |       |
| Pharmaceutical safety database                  |       |        |           |       |
| Oral Health –database                           |       |        |           |       |
| Guidelines for medical and dental practitioners |       |        |           |       |
| Patient instructions                            |       |        |           |       |
| Other                                           |       |        |           |       |

Others, Specify\_\_\_\_\_

10. How often have you used the following information sources **outside the college working hours** during the past 6 months?

|                                                                                    | Daily | Weekly | Less than weekly | Never |
|------------------------------------------------------------------------------------|-------|--------|------------------|-------|
| Dental textbooks                                                                   |       |        |                  |       |
| Other textbooks                                                                    |       |        |                  |       |
| Colleagues                                                                         |       |        |                  |       |
| Current clinical practice guidelines by Oral health division Of Ministry of Health |       |        |                  |       |
| Other guideline, Please name                                                       |       |        |                  |       |
| National Dental Journals/ Journals of local Universities                           |       |        |                  |       |
| Evidence Based Dentistry journals                                                  |       |        |                  |       |
| Other dental journals                                                              |       |        |                  |       |
| Cochrane library                                                                   |       |        |                  |       |
| Medline / PubMed article database                                                  |       |        |                  |       |
| Personal lecture notes                                                             |       |        |                  |       |
| Advertisements                                                                     |       |        |                  |       |
| Other sources, Please name                                                         |       |        |                  |       |

11. How often have you used the following information sources **at the polyclinics in the college** during the past 6 months?

|                                                                                    | Daily | Weekly | Less than weekly | Never |
|------------------------------------------------------------------------------------|-------|--------|------------------|-------|
| Dental textbooks                                                                   |       |        |                  |       |
| Other textbooks                                                                    |       |        |                  |       |
| Colleagues                                                                         |       |        |                  |       |
| Current clinical practice guidelines by Oral health division Of Ministry of Health |       |        |                  |       |

Other guideline, Please name

|                                                          |  |  |  |  |
|----------------------------------------------------------|--|--|--|--|
| National Dental Journals/ Journals of local Universities |  |  |  |  |
| Evidence Based Dentistry journals                        |  |  |  |  |
| Other dental journals                                    |  |  |  |  |
| Cochrane library                                         |  |  |  |  |
| Medline / PubMed article database                        |  |  |  |  |
| Personal lecture notes                                   |  |  |  |  |
| Advertisements                                           |  |  |  |  |
| Other sources, Please name                               |  |  |  |  |

12. Which are your primary information sources from the list above? Why do you use these?

---

---

---

13. In which dental specialist areas have you searched for scientific information from different information sources? Choose **three** specialist areas you have most frequently searched for information.

- ☐ Oral surgery
- ☐ Implantology
- ☐ Endodontics
- ☐ Prosthodontics
- ☐ Cariology
- ☐ Periodontology
- ☐ Oral radiology
- ☐ Orthodontics
- ☐ Pedodontics
- ☒ Oral Medicine and Oral Pathology
- ☐ Other, which? \_\_\_\_\_

14. Regarding evidence based dentistry, anything else you would want to add \_\_\_\_\_

---

*Thank you for your contribution!*
